# Supplementary material for: Influence of Season and Diet on Fiber Digestion and Bacterial Community Structure in the Rumen of Muskoxen (Ovibos moschatus)
Source: MDPI journal article supplement (doi:10.3390/microorganisms6030089), 2018-08-20
Supplement: s1 [file s1]

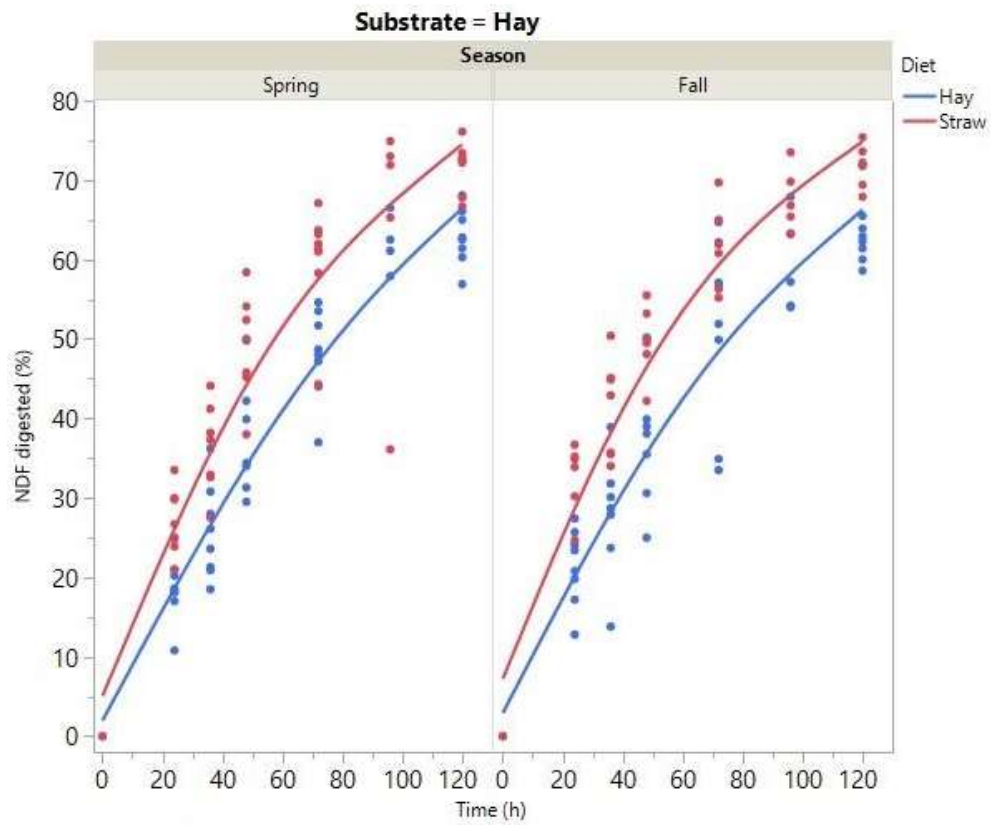

Figure S1. NDF digestion vs. time: hay substrate.

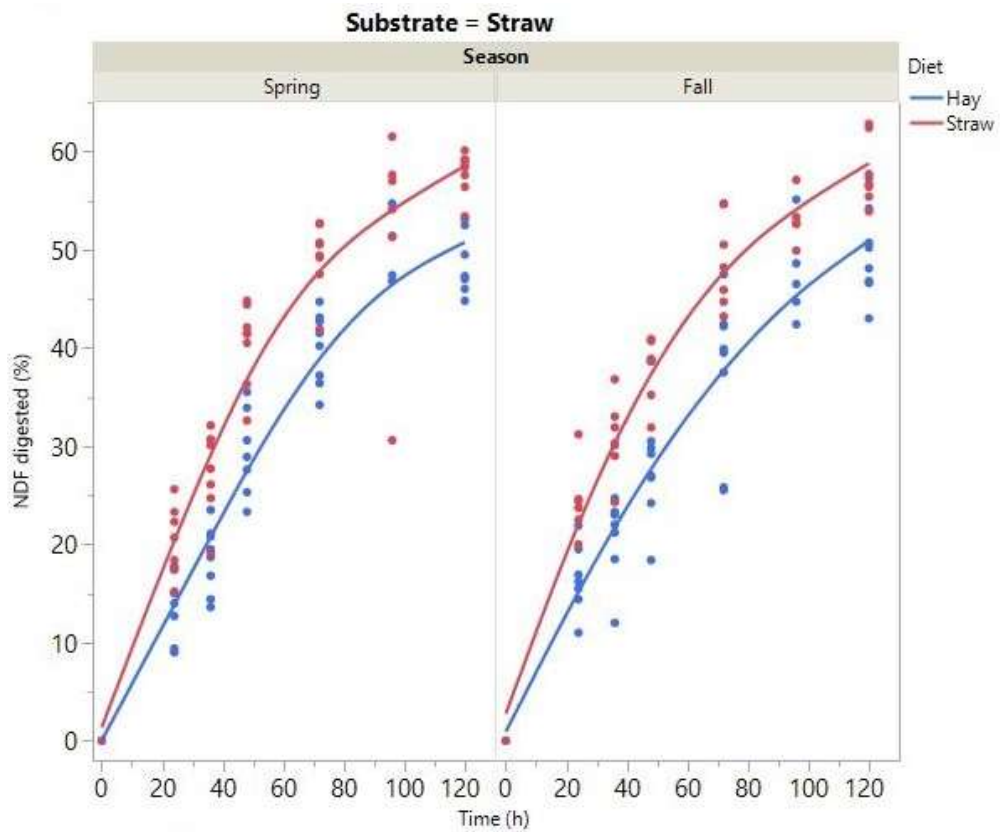

Figure S2. NDF digestion vs. time: straw substrate.
